# Supplementary material for: Quantifying fossil fuel methane emissions using observations of atmospheric ethane and an uncertain emission ratio
Source: Copernicus journal article supplement (doi:10.5194/acp-22-3911-2022), 2022-03-25
Supplement: Supplementary file 1 [file acp-22-3911-2022-supplement.zip]

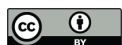

*Supplement of*

## **Quantifying fossil fuel methane emissions using observations of atmospheric ethane and an uncertain emission ratio**

**Alice E. Ramsden et al.**

*Correspondence to:* Alice E. Ramsden ([alice.ramsden@bristol.ac.uk](mailto:alice.ramsden@bristol.ac.uk))

- [acp-22-3911-2022-supplement-title-page.pdf](#)
- [AGAGE-GCMSMedusa\\_MHD\\_20040109\\_c2h6-10m-20210212.nc](#)
- [DECC-GCMSMedusa\\_TAC\\_20121217\\_c2h6-100m-20210212.nc](#)
- [DECC-GCMSMedusa\\_TAC\\_20170310\\_c2h6-185m-20210212.nc](#)

The copyright of individual parts of the supplement might differ from the article licence.
